# Supplementary material
Source: publisher site journal article supplement (https://en-cdn.bio-protocol.org/attached/file/20180122/Supplemental%20file%202%20jobplot%20assay%20analysis.xlsx)
Supplement: Supplementary file 1 [file Supplemental%20file%202%20jobplot%20assay%20analysis.xlsx]

## Sheet: FRET analysis
	RAW DATA																Buffer substraction
	Measurement: ACCEPTOR fluorescence																2	3	4	5	6	7	8	9	10	11	12	13	14
		1	2	3	4	5	6	7	8	9	10	11	12	13	14		156.833
unlabeled Protein1 labeled Protein2	A	158	91	102	112	83	102	95	104	81	93	112	77	78	81		-65.8333	-54.8333	-44.8333	-73.8333	-54.8333	-61.8333	-52.8333	-75.8333	-63.8333	-44.8333	-79.8333	-78.8333	-75.8333
		154	63	88	105	90	89	91	116	88	107	100	85	56	75		-93.8333	-68.8333	-51.8333	-66.8333	-67.8333	-65.8333	-40.8333	-68.8333	-49.8333	-56.8333	-71.8333	-100.833	-81.8333
labeled Protein1 unlabeled Protein2	B	175	190085	173701	159002	140971	131286	113366	95656	76058	65074	50345	30001	16835	73		189928	173544	158845	140814	131129	113209	95499.2	75901.2	64917.2	50188.2	29844.2	16678.2	-83.8333
		149	175851	171778	156614	141099	128016	109080	92802	74323	64308	48215	29068	15396	75		175694	171621	156457	140942	127859	108923	92645.2	74166.2	64151.2	48058.2	28911.2	15239.2	-81.8333
labeled Protein1 labeled Protein2	C	152	176733	167475	150414	135004	122827	105911	89698	69936	59900	45952	28424	15191	62		176576	167318	150257	134847	122670	105754	89541.2	69779.2	59743.2	45795.2	28267.2	15034.2	-94.8333
		153	177749	167303	150172	137332	123581	106534	87648	71315	61415	47672	28631	15280	70		177592	167146	150015	137175	123424	106377	87491.2	71158.2	61258.2	47515.2	28474.2	15123.2	-86.8333
	Measurement: FRET
		1	2	3	4	5	6	7	8	9	10	11	12	13	14		56.8333
unlabeled Protein1 labeled Protein2	A	47	69	365	853	1155	1838	2114	2444	2789	3123	2498	2040	2056	1958		12.1667	308.167	796.167	1098.17	1781.17	2057.17	2387.17	2732.17	3066.17	2441.17	1983.17	1999.17	1901.17
		81	58	394	821	1159	1720	1975	2455	2617	2801	2552	2140	1977	1900		1.16667	337.167	764.167	1102.17	1663.17	1918.17	2398.17	2560.17	2744.17	2495.17	2083.17	1920.17	1843.17
labeled Protein1 unlabeled Protein2	B	55	3156	2951	2729	2411	2305	1748	1508	1122	986	834	564	271	72		3099.17	2894.17	2672.17	2354.17	2248.17	1691.17	1451.17	1065.17	929.167	777.167	507.167	214.167	15.1667
		64	3111	3060	2595	2420	2075	1687	1558	1196	888	719	476	272	67		3054.17	3003.17	2538.17	2363.17	2018.17	1630.17	1501.17	1139.17	831.167	662.167	419.167	215.167	10.1667
labeled Protein1 labeled Protein2	C	34	3330	28518	55587	80978	106333	125981	136466	126403	108663	76715	42686	22122	1948		3273.17	28461.2	55530.2	80921.2	106276	125924	136409	126346	108606	76658.2	42629.2	22065.2	1891.17
		60	3195	28337	54965	81425	108293	125539	134647	131099	111634	79118	43337	21541	1966		3138.17	28280.2	54908.2	81368.2	108236	125482	134590	131042	111577	79061.2	43280.2	21484.2	1909.17
	Measurement: DONOR fluorescence
		1	2	3	4	5	6	7	8	9	10	11	12	13	14		60.8333
unlabeled Protein1 labeled Protein2	A	63	77	17251	37412	57694	82426	98809	118101	136403	143757	121631	98678	95130	95024		16.1667	17190.2	37351.2	57633.2	82365.2	98748.2	118040	136342	143696	121570	98617.2	95069.2	94963.2
		63	74	16962	36608	57522	79604	97055	117662	133482	141250	119503	98345	94142	92112		13.1667	16901.2	36547.2	57461.2	79543.2	96994.2	117601	133421	141189	119442	98284.2	94081.2	92051.2
labeled Protein1 unlabeled Protein2	B	61	141	70	67	75	68	76	73	78	82	81	76	77	80		80.1667	9.16667	6.16667	14.1667	7.16667	15.1667	12.1667	17.1667	21.1667	20.1667	15.1667	16.1667	19.1667
		58	135	66	67	72	71	75	76	75	85	73	79	76	78		74.1667	5.16667	6.16667	11.1667	10.1667	14.1667	15.1667	14.1667	24.1667	12.1667	18.1667	15.1667	17.1667
labeled Protein1 labeled Protein2	C	63	133	7076	15597	24932	35504	47179	60691	74853	79141	76461	78413	85262	91553		72.1667	7015.17	15536.2	24871.2	35443.2	47118.2	60630.2	74792.2	79080.2	76400.2	78352.2	85201.2	91492.2
		57	138	7065	15414	25471	35803	47044	60359	77916	81531	78936	79322	83215	88903		77.1667	7004.17	15353.2	25410.2	35742.2	46983.2	60298.2	77855.2	81470.2	78875.2	79261.2	83154.2	88842.2
																Analysis
																ratio	1:0	11:1	5:1	3:1	2:1	1.4:1	1:1	1:1.4	1:2	1:3	1:5	1:11	0:1
																Protein1 molar ratio	1	0.916667	0.833333	0.75	0.666667	0.583333	0.5	0.416667	0.333333	0.25	0.166667	0.0833333	0
																DONOR bleed through	0.420592	0.0189381	0.0211124	0.0191177	0.0212671	0.0203043	0.0203079	0.0196138	0.020387	0.0204852	0.0206525	0.0207191	0.0200217
																ACCEPTOR direct excitation	0.0168505	0.0170878	0.0165226	0.0167426	0.0164645	0.0149523	0.0156995	0.0146966	0.0136347	0.0146317	0.0157461	0.0134802	-0.152575
																FRET repeat 1	267.417	25469.2	52719.5	78188	103503	123386	133772	123854	106179	74423	40565.9	20097.2	44.8721
																FRET repeat 2	113.194	25291.4	52105.4	78585.7	105444	122938	131992	128469	109081	76750.2	41194.9	19557.4	117.15
																Protein1 molar ratio	1	0.9167	0.8333	0.75	0.6667	0.5833	0.5	0.4167	0.3333	0.25	0.1667	0.0833	0
																corrected FRET	190.306	25380.3	52412.5	78386.9	104473	123162	132882	126162	107630	75586.6	40880.4	19827.3	81.0111
																STD	109.052	125.761	434.261	281.23	1372.65	317.19	1258.7	3263.76	2051.75	1645.53	444.747	381.688	51.1083
